# Supplementary material for: Ancient experiments: forest biodiversity and soil nutrients enhanced by Native American middens
Source: Springer Nature journal article supplement (doi:10.1007/s10980-014-0033-z), 2014-04-23
Supplement: MOESM1 [file 10980_2014_33_MOESM1_ESM.docx]

**Appendix**

Table A1. Age, size, and land-use history of archaeological shell middens analyzed in this study. All dates obtained from Rick et al. (2014)1. We determined site area with subsurface auger excavations, standard excavation units, and surface observations. These values, however, differ from previous site dimensions determined solely by surface observations and reported in site data forms and Rick et al. (2014)1. Cultural periods follow Dent (1995)2. LW=Late Woodland, EW=Early Woodland, CO=Colonial, and HI=Historic.

| **Site** | **Age** | **Cultural Period** | **Area (m2)** | **Depth (cmbs)** |
| --- | --- | --- | --- | --- |
| 18AN308A | 1250-800 BC | EW | 76 | 0-25 |
| 18AN308B | 1250-800 BC | EW | 41 | 0-50 |
| 18AN741A | AD 1270-1400 | LW | 26 | 0-26 |
| 18AN741B | AD 1270-1400 | LW | 19 | 0-20 |
| 18AN226 | AD 1270-1490 | LW | 126 | 0-50 |
| 18AN287 | AD 1300-1520 | LW | 41 | 10-65 |
| 18AN294 | AD 1460-1630 | LW | 22 | 0-38 |
| 18AN854 | AD 1840-1950 | HI | 5 | 0-1 |
| 18AN1323 | AD 1860-1950 | HI | 5 | 0-70 |
| 18AN296 | AD 1660-1870 | CO/HI | 5 | 0-20 |

1. Rick, T. C. et al. 2014. Shell middens, cultural chronologies, and coastal settlement on the Rhode River sub-estuary of the Chesapeake Bay, Maryland. Geoarchaeology.

2. Dent, R. J., Jr 1995. Chesapeake Prehistory: Old Traditions New Directions. - Plenum Press.

**Table A2**: Concentration (ppm for all but pH and cation exchange capacity (MEQ/100G)) of soil chemistry in midden soils and adjacent off-midden areas (means ± 95% C.I.), with significantly higher compounds highlighted in gray. To control for multiple comparisons, we adjusted the p-values (padjusted) using Benjamini and Hochberg’s methods1.

| **Compound** | **Midden** | **Off-midden** | **t** | **p-value** | **padjusted** |
| --- | --- | --- | --- | --- | --- |
| Al | 8.3 ± 2.3 | 283.3 ± 129.6 | 4.1 | 0.002 | 0.006 |
| B | 1.5 ± 0.6 | 0.5 ± 0.1 | 3.2 | 0.008 | 0.016 |
| Ca | 14300.3 ± 7500.4 | 311.0 ± 315.4 | 3.6 | 0.005 | 0.011 |
| Cd | 0.04 ± 0.03 | 0 ± 0 | 2.4 | 0.036 | 0.052 |
| Cr | 0.01 ± 0.02 | 0.16 ± 0.06 | 4.6 | < 0.001 | 0.006 |
| Cu | 0.87 ± 0.03 | 0.88 ± 0.02 | 0.4 | 0.627 | 0.661 |
| Fe | 1.7 ± 1.2 | 75.0 ± 34.6 | 4.1 | 0.002 | 0.006 |
| K | 219.9 ± 98.6 | 143.4 ± 68.2 | 1.2 | 0.229 | 0.290 |
| Mg | 644.2 ± 392.1 | 255.5 ± 192.6 | 1.7 | 0.104 | 0.141 |
| Mn | 2.4 ± 0.8 | 1.0 ± 0.7 | 2.7 | 0.013 | 0.020 |
| Ni | 0.08 ± 0.03 | 0.11 ± 0.05 | 1.1 | 0.282 | 0.334 |
| NO32- | 28.8 ± 15.4 | 3.8 ± 7.2 | 2.8 | 0.012 | 0.020 |
| P | 2.9 ± 0.7 | 5.6 ± 1.7 | 2.9 | 0.013 | 0.020 |
| Pb | 0.4 ± 0.8 | 2.1 ± 0.5 | 3.4 | 0.002 | 0.006 |
| S | 199.3 ± 64.3 | 30.0 ± 21.3 | 4.8 | < 0.001 | 0.006 |
| Zn | 1.0 ± 0.3 | 1.2 ± 0.3 | 0.5 | 0.560 | 0.625 |
| soil organic matter | 7.5 ± 2.0 | 7.7 ± 7.2 | < 0.1 | 0.983 | 0.983 |
| pH | 7.5 ± 0.2 | 4.4 ± 0.3 | 15.8 | < 0.0001 | 0.001 |
| cation exchange capacity | 63.1 ± 20.1 | 22.2 ± 7.8 | 3.7 | 0.003 | 0.008 |

**1**Benjamini Y, Hochberg Y (1995) Controlling the false discover rate: a practical and powerful approach to multiple testing. Journal of the Royal Statistical Society Series B 57:289–300. **Table A3**. Species observed in quadrats on and off middens. Information regarding plant origin (N = native, E = exotic/non-native), morphotype, and perenniality (A = annual, B = biennial, P = perennial) derives from the USDA Plants Database (plants.usda.gov). Location refers to whether plants were found exclusively on middens, off middens or on both soil types.

| **Family** | **Scientific name** | **origin** | **ABP** | **morphotype** | **midden?** |
| --- | --- | --- | --- | --- | --- |
| Aceraceae | Acer rubrum | N | P | woody | both |
| Anacardiaceae | Toxicodendron radicans | N | P | woody | both |
| Apiaceae | Hydrocotyle verticillata | N | P | forb | both |
| Aquifoliaceae | Ilex opaca | N | P | woody | both |
| Asteraceae | Achillea millefolium | E | P | forb | both |
|  | Iva frutescens | N | P | woody | both |
| Berberidaceae | Berberis thunbergii | E | P | woody | both |
| Bignoniaceae | Campsis radicans | N | P | woody | both |
| Caprifoliaceae | Lonicera japonica | E | P | woody | both |
|  | Viburnum prunifolium | N | P | woody | both |
| Cornaceae | Cornus florida | N | P | woody | both |
|  | Nyssa sylvatica | N | P | woody | both |
| Cupressaceae | Juniperus virginiana | N | P | woody | both |
| Cyperaceae | Carex sp. | N | P | graminoid | both |
|  | Carex vulpinoidea | N | P | graminoid | both |
| Dioscoreaceae | Dioscorea villosa | N | P | forb | both |
| Ebenaceae | Diospyros virginiana | N | P | woody | both |
| Ericaceae | Kalmia latifolia | N | P | woody | both |
|  | Vaccinium corymbosum | N | P | woody | both |
| Fabaceae | Robinia pseudoacacia | N | P | woody | both |
| Fagaceae | Fagus grandifolia | N | P | woody | both |
|  | Quercus michauxii | N | P | woody | both |
|  | Quercus palustris | N | P | woody | both |
|  | Quercus prinus | N | P | woody | both |
| Hamamelidaceae | Liquidambar styraciflua | N | P | woody | both |
| Juglandaceae | Carya alba | N | P | woody | both |
| Juncaceae | Juncus tenuis | N | P | graminoid | both |
| Lauraceae | Sassafras albidum | N | P | woody | both |
| Liliaceae | Allium vineale | E | P | forb | both |
| Magnoliaceae | Liriodendron tulipifera | N | P | woody | both |
| Malvaceae | Hibiscus moscheutos | N | AP | woody | both |
| Oleaceae | Fraxinus pennsylvanica | N | P | woody | both |
| Pinaceae | Pinus virginiana | N | P | woody | both |
| Poaceae | Agrostis gigantea | E | P | graminoid | both |
|  | Elymus villosus | N | P | graminoid | both |
|  | Festuca rubra | N | P | graminoid | both |
|  | Leersia virginica | N | P | graminoid | both |
|  | Schedonorus pratensis | E | P | graminoid | both |
|  | Sorghum halepense | E | P | graminoid | both |
|  | Tripsacum dactyloides | N | P | graminoid | both |
| Polygonaceae | Polygonum arifolium | N | A | forb | both |
| Polygonaceae | Polygonum arifolium | N | A | woody | both |
|  | Polygonum hydropiperoides | N | P | forb | both |
| Pyrolaceae | Chimaphila maculata | N | P | woody | both |
| Rosaceae | Geum canadense | N | P | forb | both |
|  | Prunus serotina | N | P | woody | both |
|  | Rosa multiflora | E | P | woody | both |
|  | Rubus allegheniensis | N | P | woody | both |
| Rubiaceae | Galium circaezans | N | P | forb | both |
| Salicaceae | Salix nigra | N | P | woody | both |
| Smilacaceae | Smilax rotundifolia | N | P | woody | both |
| Ulmaceae | Ulmus rubra | N | P | woody | both |
| Vitaceae | Parthenocissus quinquefolia | N | P | woody | both |
|  | Vitis labrusca | N | P | woody | both |
| Aspleniaceae | Asplenium platyneuron | N | P | forb | off |
| Asteraceae | Baccharis halimifolia | N | P | woody | off |
| Cyperaceae | Schoenoplectus americanus | N | P | graminoid | off |
| Lamiaceae | Perilla frutescens | E | A | forb | off |
| Lauraceae | Lindera benzoin | N | P | woody | off |
| Poaceae | Distichlis spicata | N | P | graminoid | off |
|  | Setaria parviflora | N | P | graminoid | off |
| Polygonaceae | Rumex acetosella | E | P | forb | off |
| Rubiaceae | Mitchella repens | N | P | forb | off |
| Araceae | Arisaema triphyllum | N | P | forb | on |
| Asteraceae | Antennaria plantaginifolia | N | P | forb | on |
|  | Cirsium arvense | E | P | forb | on |
|  | Eupatorium serotinum | N | P | forb | on |
|  | Solidago bicolor | N | P | forb | on |
|  | Solidago sempervirens | N | P | forb | on |
|  | Sonchus asper | E | A | forb | on |
|  | Taraxacum officinale | E | P | forb | on |
|  | Verbesina occidentalis | N | P | forb | on |
| Caprifoliaceae | Viburnum dentatum | N | P | woody | on |
| Celastraceae | Celastrus orbiculatus | E | P | woody | on |
| Chenopodiaceae | Atriplex prostrata | N | A | forb | on |
| Cyperaceae | Bulbostylis capillaris | N | AP | graminoid | on |
| Fabaceae | Cercis canadensis | N | P | woody | on |
| Fagaceae | Quercus ilicifolia | N | P | woody | on |
| Juglandaceae | Carya cordiformis | N | P | woody | on |
| Malvaceae | Kosteletzkya virginica | N | P | woody | on |
| Moraceae | Morus rubra | N | P | woody | on |
| Onagraceae | Ludwigia alternifolia | N | P | forb | on |
| Oxalidaceae | Oxalis stricta | N | P | forb | on |
| Plantaginaceae | Plantago lanceolata | E | ABP | forb | on |
| Poaceae | Andropogon virginicus | N | P | graminoid | on |
|  | Dichanthelium villosissimum | N | P | graminoid | on |
|  | Phalaris arundinacea | N | P | graminoid | on |
|  | Sphenopholis nitida | N | P | graminoid | on |
| Rosaceae | Crataegus pruinosa | N | P | woody | on |
| Rosaceae | Rubus phoenicolasius | E | P | woody | on |
| Rubiaceae | Galium odoratum | E | P | forb | on |
| Smilacaceae | Smilax glauca | N | P | woody | on |

**Figure A1.** Changes in species richness and vegetative cover through time. EW refers to the Early Woodland Period (1250-800 BC), LW refers to the Late Woodland Period (AD 1270-1630), and HI refers to the historic and colonial period (AD 1630-1950).
